# Supplementary material for: Clicked dipicolinic antennae for lanthanide luminescent probes
Source: Royal Society of Chemistry journal article supplement (doi:10.1039/c002982c), 2010-01-01
Supplement: c002982c.pdf [file c002982c.pdf]

## Electronic Supplementary Information

### Clicked Dipicolinic Antennae for Lanthanide Fluorescent Probes

**Zein El Abidine Chamas<sup>a</sup>, Xianmin Guo,<sup>b</sup> Jean-Louis Canet,<sup>\*c,d</sup> Arnaud Gautier<sup>a,d</sup>, Damien Boyer<sup>\*e,f</sup> and Rachid Mahiou<sup>b,f</sup>**

<sup>a</sup> Clermont Université, Université Blaise Pascal, Laboratoire SEESIB, BP 10448, F-63000 Clermont-Ferrand, France

<sup>b</sup> Clermont Université, Université Blaise Pascal, Laboratoire des Matériaux Inorganiques, BP 10448, F-63000 Clermont-Ferrand, France

<sup>c</sup> Clermont Université, ENSCCF, Laboratoire SEESIB, BP 10448, F-63000 Clermont-Ferrand, France. Tel : +33 (0)4 73 40 70 32 ; Fax : +33 (0)4 73 40 77 17 ; E-mail : j-louis.canet@univ-bpclermont.fr

<sup>d</sup> CNRS, UMR 6504, SEESIB, F-63177 Aubière, France

<sup>e</sup> Clermont Université, ENSCCF, Laboratoire des Matériaux Inorganiques, BP 10448, F-63000 Clermont-Ferrand, France. . Tel : +33 (0)4 73 40 76 47 ; Fax : +33 (0)4 73 40 71 08 ; E-mail : damien.boyer@univ-bpclermont.fr

<sup>f</sup> CNRS, UMR 6002, LMI, F-63177 Aubière, France

## OPTICAL CHARACTERIZATIONS

### Photoluminescence results recorded from europium complexes in OPE conditions

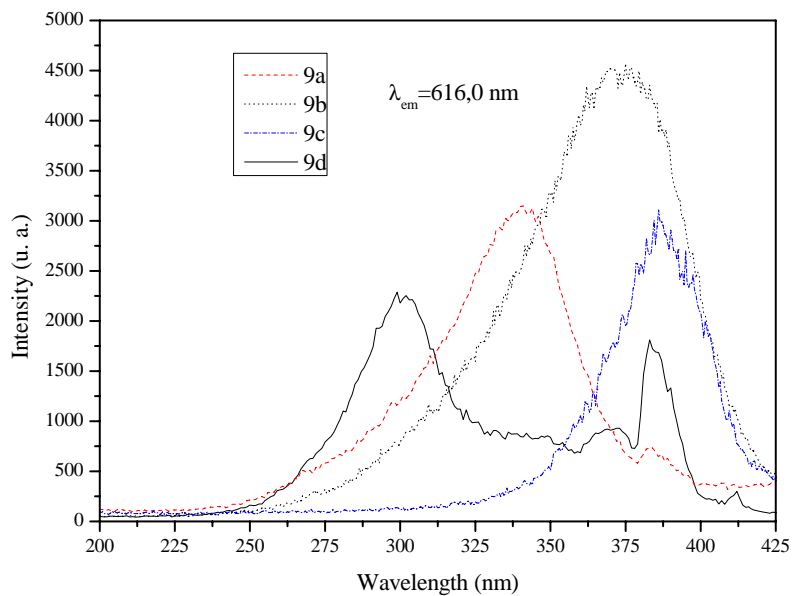

**Figure S1.** Excitation spectra recorded at RT from europium doped complexes by monitoring the  $\text{Eu}^{3+} \text{}^5\text{D}_0 \rightarrow \text{}^7\text{F}_2$  transition (616.0 nm).

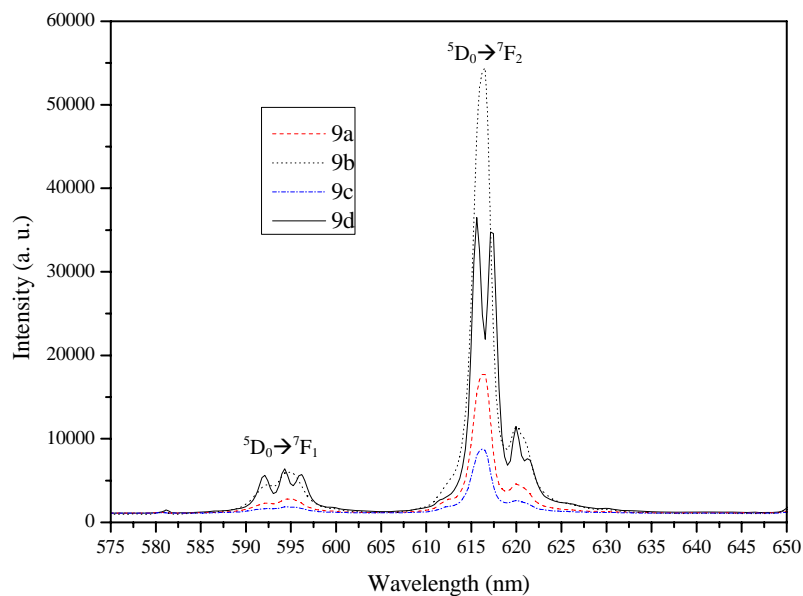

**Figure S2.** Emission spectra recorded at RT from europium doped complexes upon excitation in stronger excitation band (see Fig. S2).

## Photoluminescence results recorded from terbium complexes in OPE conditions

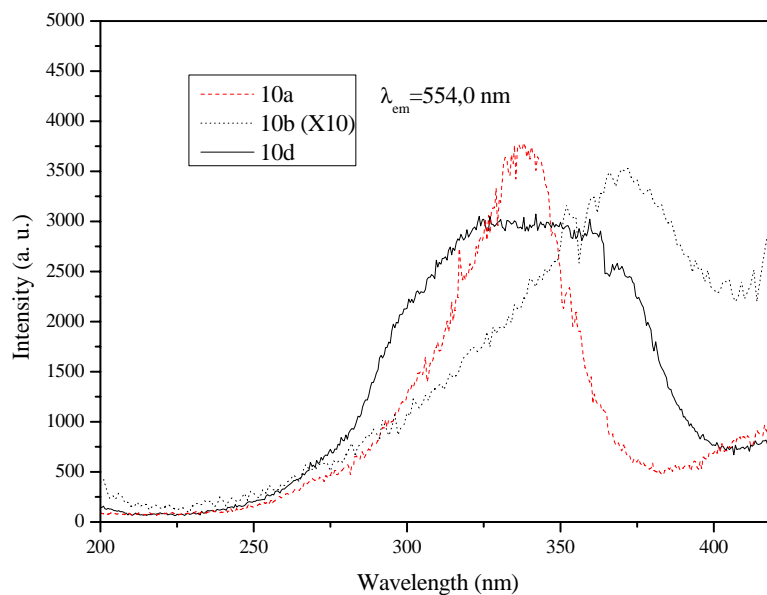

**Figure S3.** Excitation spectra recorded at RT from terbium doped complexes by monitoring the  $Tb^{3+} {}^5D_4 \rightarrow {}^7F_5$  transition (554.0 nm).

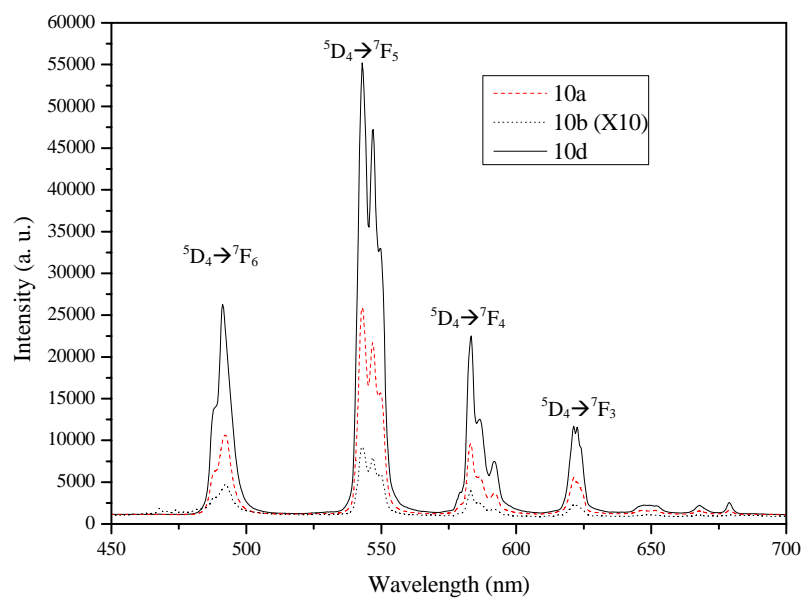

**Figure S4.** Emission spectra recorded at RT from terbium doped complexes upon excitation in stronger excitation band (see Fig. S3).

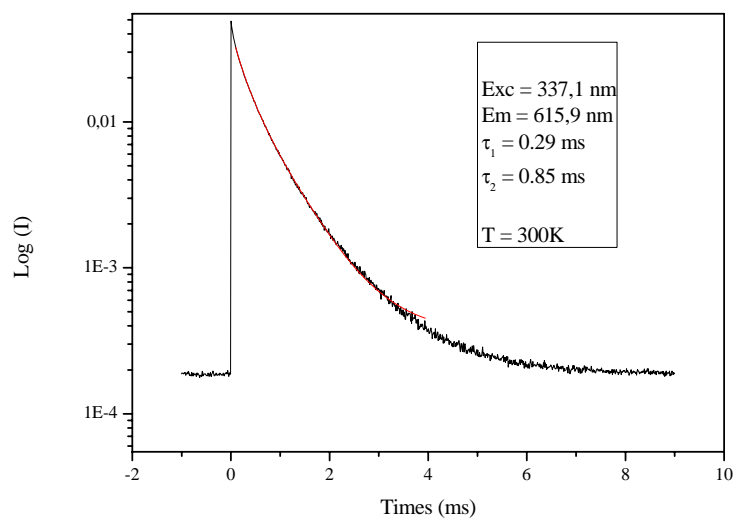

**Figure S5.** Decay curve recorded from compound 9b in OPE conditions.

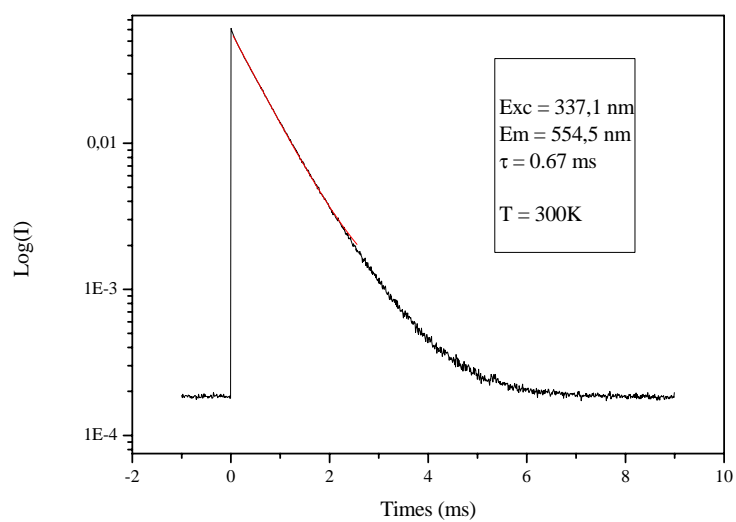

**Figure S6.** Decay curve recorded from compound 10d in OPE conditions.

## Photoluminescence results recorded from complexes **9b** and **10d** in TPE conditions

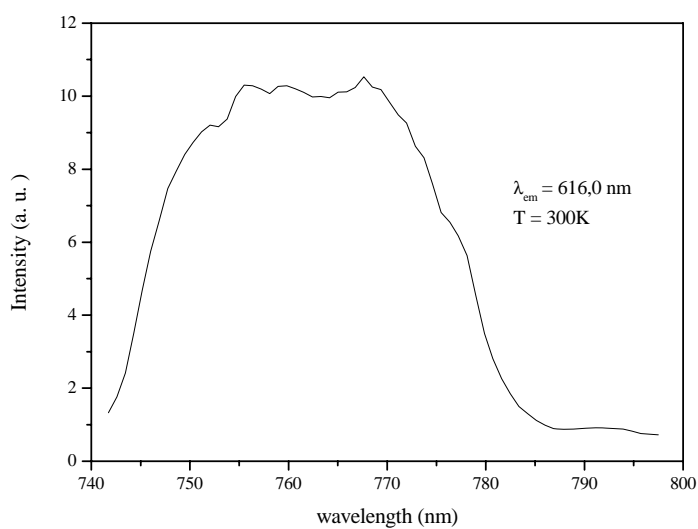

**Figure S7.** Excitation spectrum recorded at RT from complex **9b** by monitoring the  $\text{Eu}^{3+}$   ${}^5\text{D}_0 \rightarrow {}^7\text{F}_2$  transition (616.0 nm) in TPE range.

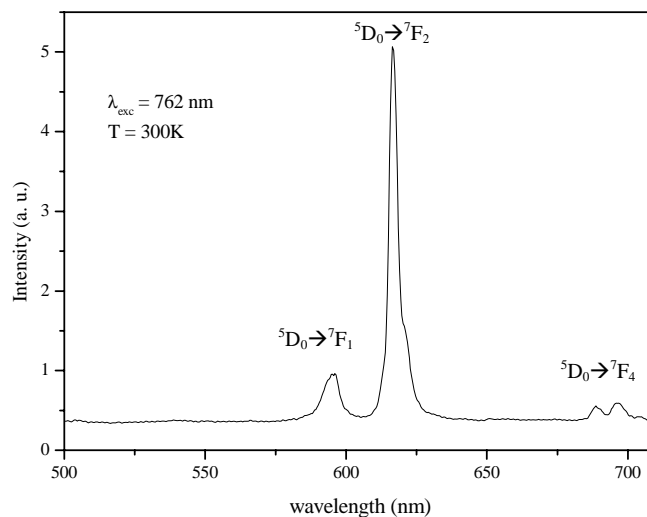

**Figure S8.** Emission spectrum recorded at RT from complex **9b** upon TPE conditions at 762 nm.

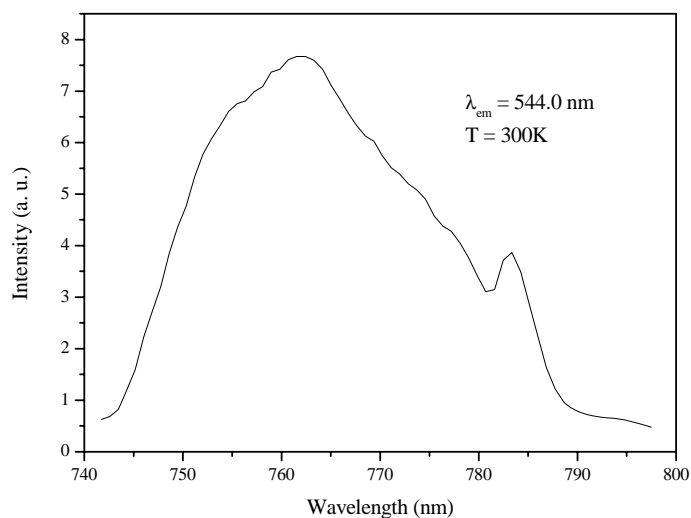

**Figure S9.** Excitation spectrum recorded at RT from complex **10d** by monitoring the  $\text{Tb}^{3+}$   $^5\text{D}_4 \rightarrow ^7\text{F}_5$  transition (544.0 nm) in TPE range.

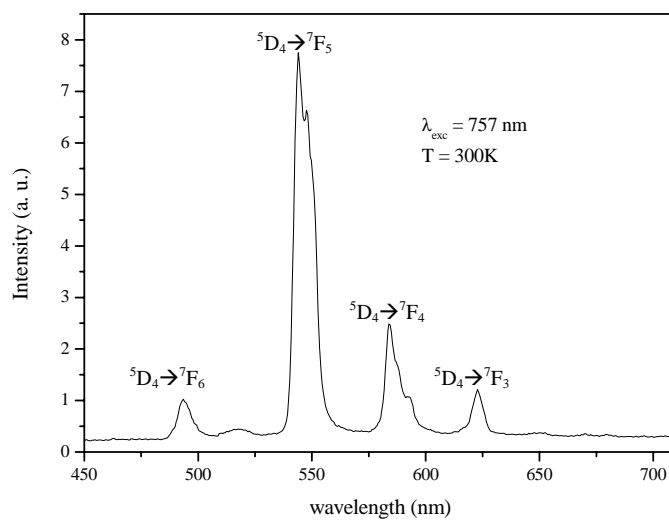

**Figure S10.** Emission spectrum recorded at RT from complex **10d** upon TPE conditions at 757 nm.

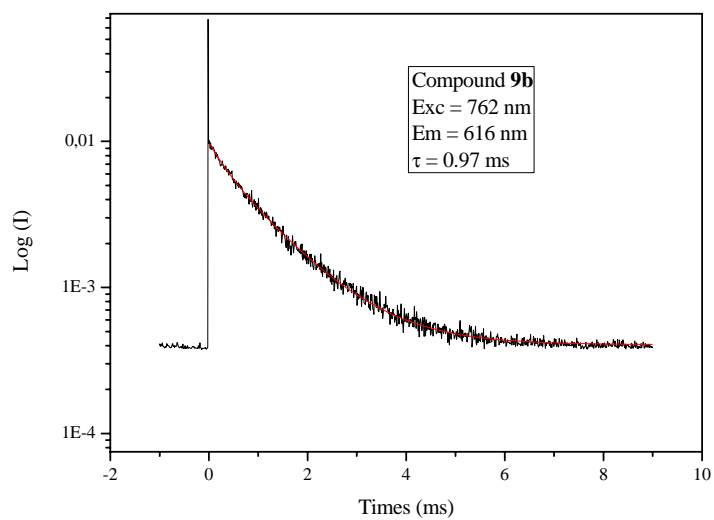

**Figure S11.** Decay curve recorded from compound **9b** in TPE conditions.

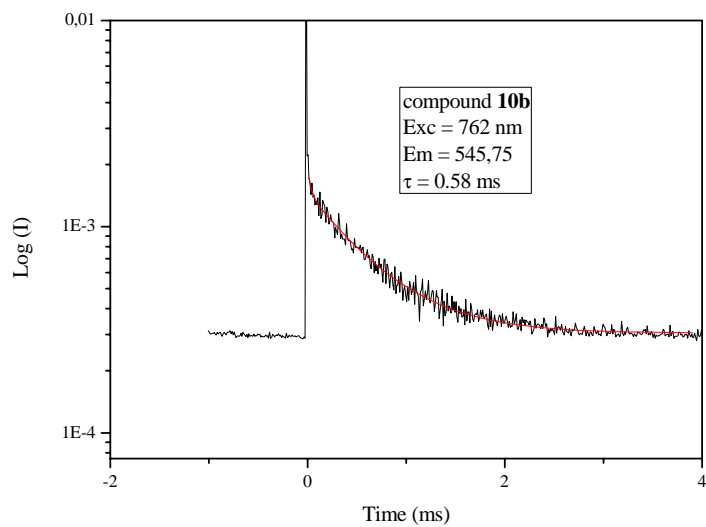

**Figure S12.** Decay curve recorded from compound **9b** in TPE conditions.

### Photoluminescence spectra recorded from complexes **9b** and **10d** in THPE conditions

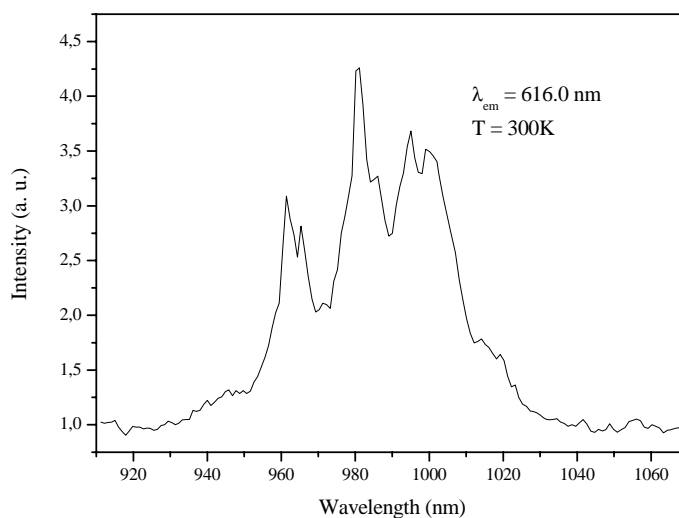

**Figure S13.** Excitation spectrum recorded at RT from complex **9b** by monitoring the  $\text{Eu}^{3+}$   $^5\text{D}_0 \rightarrow ^7\text{F}_2$  transition (616.0 nm) in THPE range.

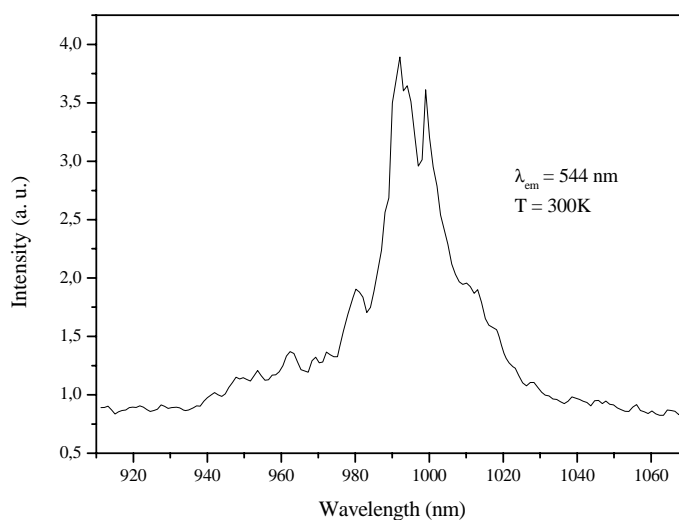

**Figure S14.** Excitation spectrum recorded at RT from complex **10d** by monitoring the  $\text{Tb}^{3+}$   $^5\text{D}_4 \rightarrow ^7\text{F}_5$  transition (544.0 nm) in THPE range.

**Remark:** Emission spectra as well as decay curves are not presented since the signal to noise ratio was too weak to get suitable data.



## PREPARATION AND CHARACTERIZATION OF COATINGS

### Coatings preparation

The hybrid films were prepared from the solution of Ln(**12**)<sub>3</sub> (Ln = Eu, Tb) in ethanol via the method of spin-coating. Typically, the detailed procedure for the spin-coating is as follows: Compound **12** (152 mg, 0.28 mmol, 3 equivalents) and Ln(NO<sub>3</sub>)<sub>3</sub>·6H<sub>2</sub>O (0.094 mmol, 1 equivalent) were dissolved, under argon and at room temperature, in 3 mL of anhydrous ethanol. After stirring for 10 hours, the solution was carefully dropped into the middle of the clean glass substrate. The transparent films were obtained with a rotation speed of 5000 rpm for 2 minutes, and after drying at 80 °C in an oven for 2 hours.

### Profilometry analyses

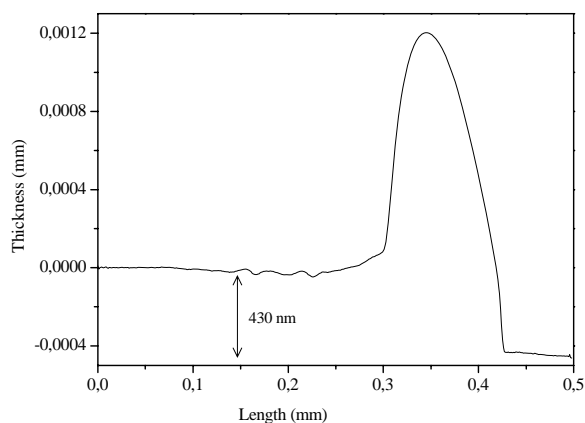

**Figure S15.** Profilometry analysis from **13a** derived film: the thickness is about 430 nm.

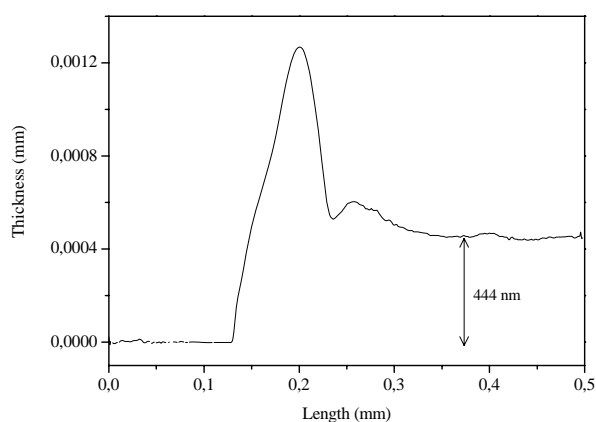

**Figure S16.** Profilometry analysis from **13b** derived film: the thickness is about 444 nm.

## Scanning electron microscopy analysis

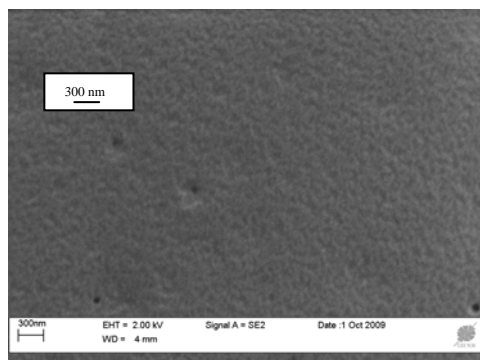

**Figure S17.** SEM micrograph recorded from **13a** derived coating.

## Photoluminescence results from films

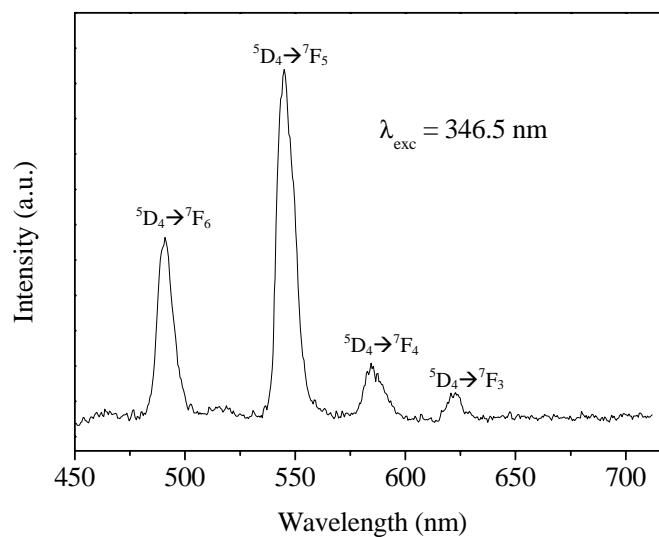

**Figure S18.** Emission spectrum recorded at RT from **13a** derived film upon excitation at 346.5 nm.

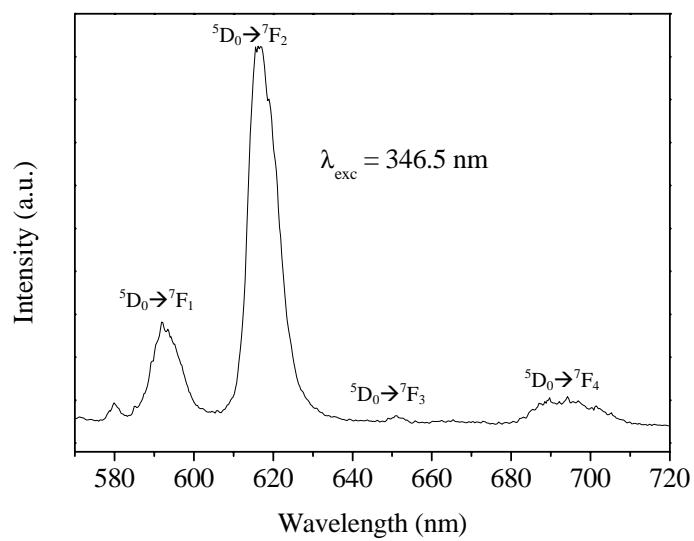

**Figure S19.** Emission spectrum recorded at RT from **13b** derived film upon excitation at 346.5 nm.
